# Supplementary material
Source: PubMed Central journal article supplement (PMC6857021)
Supplement: DS1_JVDI_10.1177_1040638719856651.pdf [file DS1_JVDI_10.1177_1040638719856651.pdf]

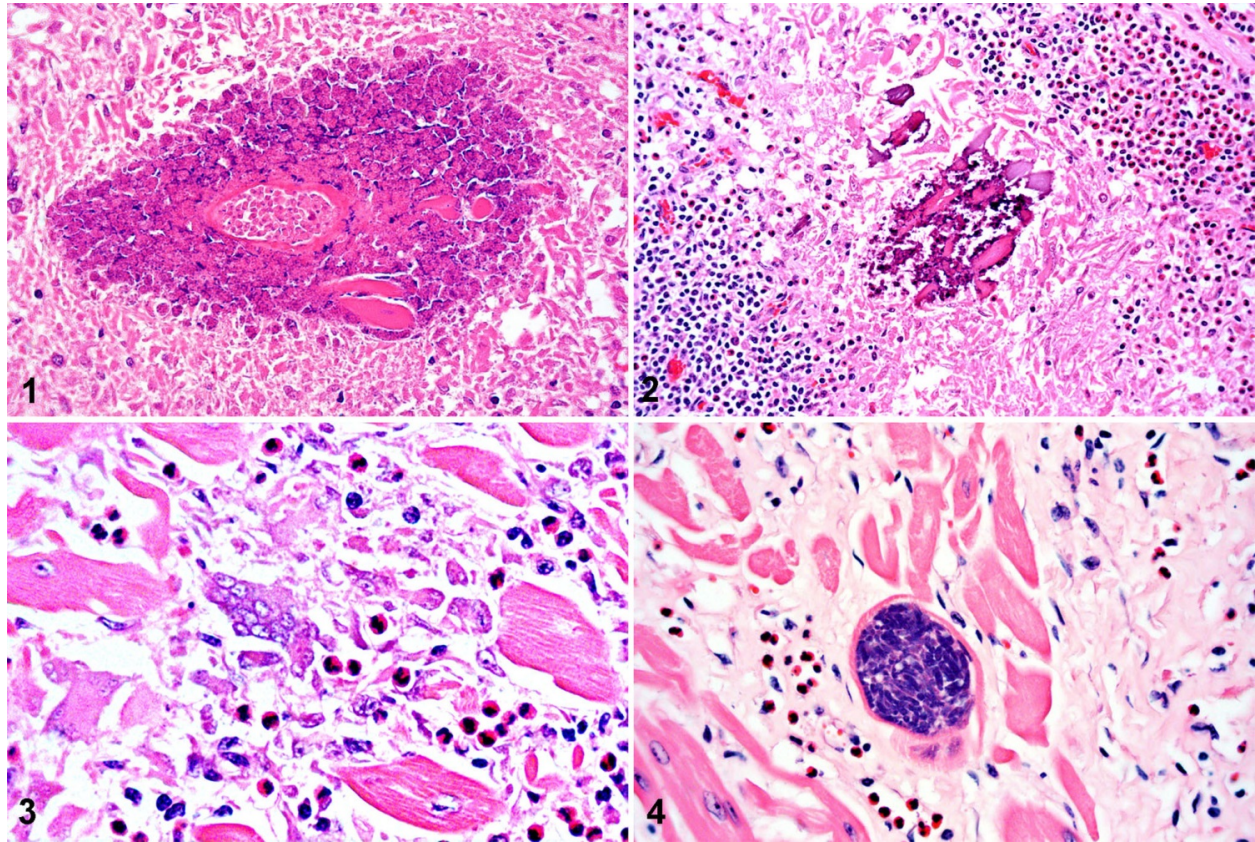

**Supplementary Figures 1–4.** Eosinophilic granulomatous myocarditis in a heifer. H&E.

**Supplementary Figure 1.** A degenerate sarcocyst is present within the sarcoplasm of a necrotic cardiomyocyte in the center of a granuloma. **Supplementary Figure 2.** Mineralization in the necrotic center of a granuloma, surrounded by eosinophilic, lymphocytic, and histiocytic interstitial inflammatory infiltrate. **Supplementary Figure 3.** The myocardial interstitium is markedly expanded by numerous eosinophils, fewer lymphocytes, and multinucleate giant cells (center, lower left). **Supplementary Figure 4.** A thin-walled ovoid *Sarcocystis cruzi* cyst containing elongated basophilic zoites expands the sarcoplasm of a cardiomyocyte; the adjacent

interstitium is infiltrated by eosinophils and fewer lymphocytes and expanded by mature collagenous fibrous tissue.
